# Supplementary material for: SHP2 mutations induce precocious gliogenesis of Noonan syndrome-derived iPSCs during neural development in vitro
Source: PubMed Central journal article supplement (PMC7268229; doi:10.1186/s13287-020-01709-4), 2020-06-03
Supplement: 13287_2020_1709_MOESM1_ESM.pdf [file 13287_2020_1709_MOESM1_ESM.pdf]

## Additional file 1: Supplemental Tables

**Supplemental Table 1. Primers<sup>a</sup> used in this study**

| <b>Gene</b>   | <b>Accession No</b> | <b>Forward</b>        | <b>Reverse</b>          | <b>Size</b> |
|---------------|---------------------|-----------------------|-------------------------|-------------|
| <i>PAX6</i>   | NM_000280.4         | GTGTCCAACGGATGTGTGAG  | CTAGCCAGGTTGCGAAGAAC    | 254         |
| <i>ZIC1</i>   | NM_003412.4         | GCGCTCCGAGAATTTAAAGA  | CGTGGACCTTCATGTGTTTG    | 212         |
| <i>SOX2</i>   | NM_003106.4         | ACTGGCGAACCATCTCTGTG  | AATTACCAACGGTGTCAACCTG  | 118         |
| <i>SOX1</i>   | NM_005986.3         | CCTCCGTCCATCCTCTG     | AAAGCATCAAACAACCTCAAG   | 201         |
| <i>OTX2</i>   | NM_021728.4         | GAAGCACTGTTTGCCAAGACC | CTCCATTCTGCTGTTGTTGCT   | 151         |
| <i>CDH2</i>   | NM_001792.5         | GATATGCTTCAACACGCTTT  | CCAAGATAATAAAATCGCTCCAT | 98          |
| <i>NESTIN</i> | NM_006617.2         | GCAGGAGAAACAGGGCCTAC  | AAAGCTGAGGGAAGTCTTGGA   | 175         |
| <i>GAPDH</i>  | NM_001289745        | CTTCGCTCTCTGCTCCTCCT  | GTAAAAGCAGCCCTGGTGA     | 152         |

<sup>a</sup>Primers were able to detect all of the isoforms of each gene.

**Supplemental Table 2. Primary antibodies used for the immunofluorescence and western blotting assays**

| Primary antibody               | Species | Dilution | Company              | Cat.no      | AB Registry ID (RRID) |
|--------------------------------|---------|----------|----------------------|-------------|-----------------------|
| OCT4                           | Goat    | 1:200    | Santacruz            | sc-8628     | AB_653551             |
| SOX2                           | Rabbit  | 1:200    | Cell signaling       | #3579S      | AB_2195767            |
| NANOG                          | Rabbit  | 1:200    | Cell signaling       | #3580S      | AB_2150399            |
| TRA-1-60                       | Mouse   | 1:200    | Milipore             | MAB4360     | AB_2119183            |
| TRA-1-81                       | Mouse   | 1:200    | Milipore             | MAB4381     | AB_177638             |
| NESTIN                         | Mouse   | 1:100    | Milipore             | MAB5326     | AB_2251134            |
| SOX1                           | Goat    | 1:300    | R&D systems          | AF3369      | AB_2239879            |
| NCAD                           | Mouse   | 1:200    | BD sciences          | 610920      | AB_2077527            |
| MAP2                           | Mouse   | 1:1000   | Sigma-Aldrich        | M1406       | AB_477171             |
| TAU1                           | Mouse   | 1:200    | Milipore             | MAB3420     | AB_94855              |
| GFAP                           | Rabbit  | 1:1000   | Abcam                | Ab7260      | AB_305808             |
| GLAST (ASCA-1)                 | Mouse   | 1:300    | MACS Meltenyi Biotec | 130-095-822 | AB_10829302           |
| S100 $\beta$                   | Rabbit  | 1:300    | Proteintech          | 15146-1-AP  | AB_2254244            |
| pY542-SHP2                     | Rabbit  | 1:500    | Cell signaling       | #9793S      | AB_10694365           |
| pY580-SHP2                     | Rabbit  | 1:500    | Cell signaling       | #9793S      | AB_10694365           |
| SHP2                           | Rabbit  | 1:500    | Cell signaling       | #9793S      | AB_10694365           |
| Phospho-p42/44 MAPK (p-ERK1/2) | Rabbit  | 1:1000   | Cell signaling       | #4370       | AB_2315112            |
| p42/44 MAPK (ERK1/2)           | Rabbit  | 1:1000   | Cell signaling       | #9102       | AB_330744             |
| p-SMAD1                        | Rabbit  | 1:500    | Cell signaling       | #9511       | AB_331671             |
| SMAD1                          | Rabbit  | 1:500    | Cell signaling       | #9743       | AB_2107780            |
| p-SMAD2                        | Rabbit  | 1:500    | Cell signaling       | #3108       | AB_490941             |
| SMAD2                          | Rabbit  | 1:500    | Cell signaling       | #3102       | AB_331675             |
| p-STAT3                        | Mouse   | 1:500    | Santacruz            | sc-8059     | AB_628292             |
| STAT3                          | Mouse   | 1:500    | Santacruz            | Sc-8019     | AB_628293             |
| Cleaved Notch1 (Val1744)       | Rabbit  | 1:500    | Cell signaling       | #4147       | AB_2153348            |
| Notch1 (C-20)                  | Goat    | 1:500    | Santacruz            | sc-6014     | AB_650336             |
| p-CREB(Ser133)                 | Rabbit  | 1:1000   | Cell signaling       | 9198S       | AB_2561044            |
| CREB                           | Mouse   | 1:1000   | Cell signaling       | 9104S       | AB_10691832           |
| HRP-conjugated GAPDH           | Rabbit  | 1:1000   | Santacruz            | Sc-25778    | AB_10167668           |
