# Supplementary material for: SHP2 mutations induce precocious gliogenesis of Noonan syndrome-derived iPSCs during neural development in vitro
Source: PubMed Central journal article supplement (PMC7268229; doi:10.1186/s13287-020-01709-4), 2020-06-03

### Additional File 4: Fig. S3

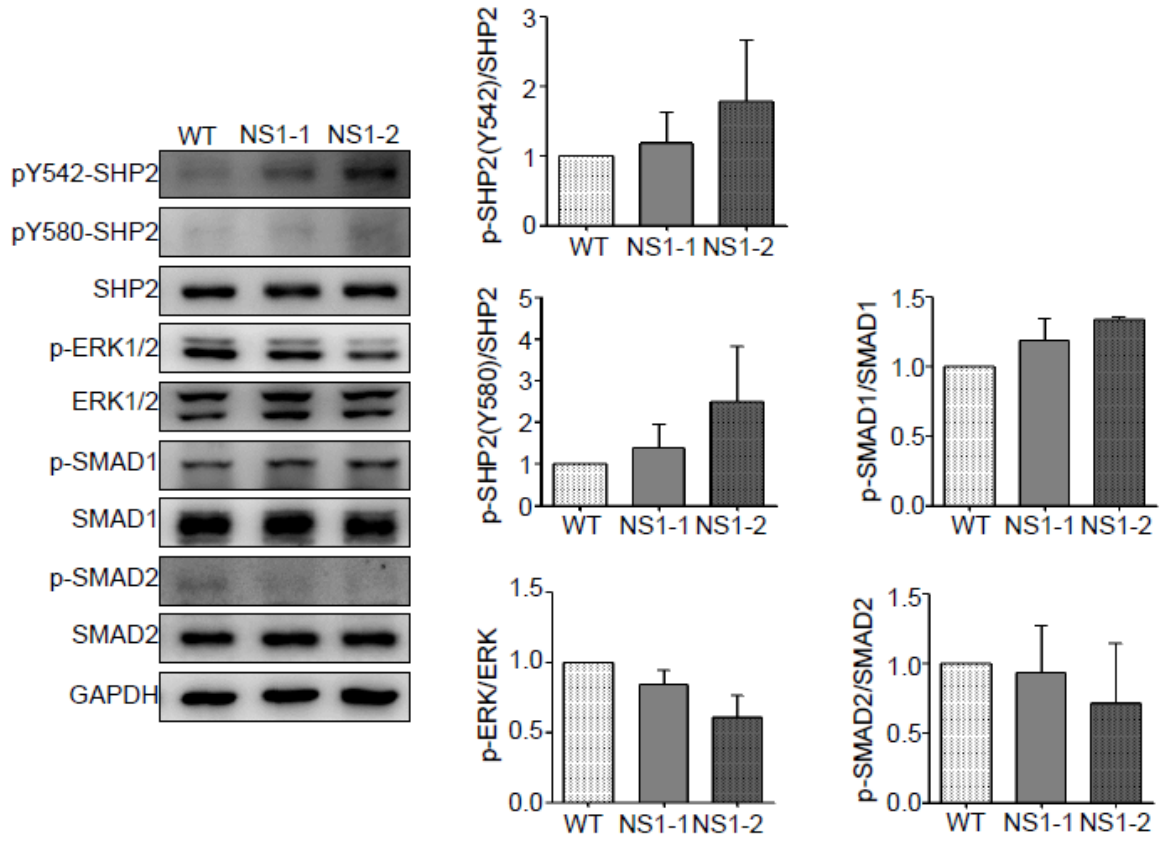

Supplement: 13287_2020_1709_MOESM4_ESM.pdf [file 13287_2020_1709_MOESM4_ESM.pdf]
